# Supplementary material
Source: ML conference proceedings conference paper supplement (https://proceedings.mlr.press/v119/ma20c.html)
Supplement: Supplementary file [file ma20c-supp.pdf]

## A. Proofs for Lemma 1, Lemma 2 and Lemma 3

Our proofs are inspired by (Ghosh et al., 2017).

**Lemma 1.** *In a multi-class classification problem, any normalized loss function  $\mathcal{L}_{norm}$  is noise tolerant under symmetric (or uniform) label noise, if noise rate  $\eta < \frac{K-1}{K}$ .*

*Proof.* For symmetric label noise, the noise risk can be defined as:

$$\begin{aligned} R^\eta(f) &= \mathbb{E}_{\mathbf{x}, \hat{y}} \mathcal{L}_{norm}(f(\mathbf{x}), \hat{y}) = \mathbb{E}_{\mathbf{x}} \mathbb{E}_{y|\mathbf{x}} \mathbb{E}_{\hat{y}|\mathbf{x}, y} \mathcal{L}_{norm}(f(\mathbf{x}), \hat{y}) \\ &= \mathbb{E}_{\mathbf{x}} \mathbb{E}_{y|\mathbf{x}} \left[ (1 - \eta) \mathcal{L}_{norm}(f(\mathbf{x}), y) + \frac{\eta}{K-1} \sum_{k \neq y} \mathcal{L}_{norm}(f(\mathbf{x}), k) \right] \\ &= (1 - \eta) R(f) + \frac{\eta}{K-1} \left( \mathbb{E}_{\mathbf{x}, y} \left[ \sum_{k=1}^K \mathcal{L}_{norm}(f(\mathbf{x}), k) \right] - R(f) \right) \\ &= R(f) \left( 1 - \frac{\eta K}{K-1} \right) + \frac{\eta}{K-1}, \end{aligned}$$

where the last equality holds due to  $\sum_{k=1}^K \mathcal{L}_{norm}(f(\mathbf{x}), k) = 1$ , following Eq. (1). Thus,

$$R^\eta(f^*) - R^\eta(f) = \left( 1 - \frac{\eta K}{K-1} \right) (R(f^*) - R(f)) \leq 0,$$

because  $\eta < \frac{K-1}{K}$  and  $f^*$  is a global minimizer of  $R(f)$ . This proves  $f^*$  is also the global minimizer of risk  $R^\eta(f)$ , that is,  $\mathcal{L}_{norm}$  is noise tolerant to symmetric label noise.  $\square$

**Lemma 2.** *In a multi-class classification problem, given  $R(f^*) = 0$  and  $0 \leq \mathcal{L}_{norm}(f^*(\mathbf{x}), k) \leq \frac{1}{K-1}$ , any normalized loss function  $\mathcal{L}_{norm}$  is noise tolerant under asymmetric (or class-conditional) label noise, if noise rate  $\eta_{jk} < 1 - \eta_y$ .*

*Proof.* For asymmetric or class-conditional noise,  $1 - \eta_y$  is the probability of a label being correct (i.e.,  $k = y$ ), and the noise condition  $\eta_{yk} < 1 - \eta_y$  generally states that a sample  $\mathbf{x}$  still has the highest probability of being in the correct class  $y$ , though it has probability of  $\eta_{yk}$  being in an arbitrary noisy (incorrect) class  $k \neq y$ . Considering the noise transition matrix between classes  $[\eta_{ij}]$ ,  $\forall i, j \in \{1, 2, \dots, K\}$ , this condition only requires that the matrix is diagonal dominated by  $\eta_{ii}$  (i.e., the correct class probability  $1 - \eta_y$ ). Following the symmetric case, here we have,

$$\begin{aligned} R^\eta(f) &= \mathbb{E}_{\mathbf{x}, \hat{y}} \mathcal{L}_{norm}(f(\mathbf{x}), \hat{y}) = \mathbb{E}_{\mathbf{x}} \mathbb{E}_{y|\mathbf{x}} \mathbb{E}_{\hat{y}|\mathbf{x}, y} \mathcal{L}_{norm}(f(\mathbf{x}), \hat{y}) \\ &= \mathbb{E}_{\mathbf{x}} \mathbb{E}_{y|\mathbf{x}} \left[ (1 - \eta_y) \mathcal{L}_{norm}(f(\mathbf{x}), y) + \sum_{k \neq y} \eta_{yk} \mathcal{L}_{norm}(f(\mathbf{x}), k) \right] \\ &= \mathbb{E}_{\mathbf{x}, y} \left[ (1 - \eta_y) \left( \sum_{k=1}^K \mathcal{L}_{norm}(f(\mathbf{x}), k) - \sum_{k \neq y} \mathcal{L}_{norm}(f(\mathbf{x}), k) \right) \right] + \mathbb{E}_{\mathbf{x}, y} \left[ \sum_{k \neq y} \eta_{yk} \mathcal{L}_{norm}(f(\mathbf{x}), k) \right] \\ &= \mathbb{E}_{\mathbf{x}, y} \left[ (1 - \eta_y) \left( 1 - \sum_{k \neq y} \mathcal{L}_{norm}(f(\mathbf{x}), k) \right) \right] + \mathbb{E}_{\mathbf{x}, y} \left[ \sum_{k \neq y} \eta_{yk} \mathcal{L}_{norm}(f(\mathbf{x}), k) \right] \\ &= \mathbb{E}_{\mathbf{x}, y} (1 - \eta_y) - \mathbb{E}_{\mathbf{x}, y} \left[ \sum_{k \neq y} (1 - \eta_y - \eta_{yk}) \mathcal{L}_{norm}(f(\mathbf{x}), k) \right]. \end{aligned} \tag{7}$$

As  $f_\eta^*$  is the minimizer of  $R^\eta(f)$ ,  $R^\eta(f_\eta^*) - R^\eta(f^*) \leq 0$ . So, from 7 above, we have,

$$\mathbb{E}_{\mathbf{x}, y} \left[ \sum_{k \neq y} (1 - \eta_y - \eta_{yk}) \left( \underbrace{\mathcal{L}_{norm}(f^*(\mathbf{x}), k)}_{\mathcal{L}_{norm}^*} - \underbrace{\mathcal{L}_{norm}(f_\eta^*(\mathbf{x}), k)}_{\mathcal{L}_{norm}^{\eta^*}} \right) \right] \leq 0. \tag{8}$$

Next, we prove,  $f_\eta^* = f^*$  holds following Eq. (8). First,  $(1 - \eta_y - \eta_{yk}) > 0$  as per the assumption that  $\eta_{yk} < 1 - \eta_y$ . Thus,  $\mathcal{L}_{norm}^* - \mathcal{L}_{norm}^{\eta^*} \leq 0$  for Eq. (8) to hold. Since we are given  $R(f^*) = 0$ , we have  $\mathcal{L}(f^*(\mathbf{x}), y) = 0$ . Thus, following the definition of  $\mathcal{L}_{norm}$  in Eq. (1) and assumption  $\mathcal{L}_{norm}(f^*(\mathbf{x}), k) \leq \frac{1}{K-1}$ , we have  $\mathcal{L}_{norm}(f^*(\mathbf{x}), k) = \frac{\mathcal{L}(f^*(\mathbf{x}), 0, k)}{\sum_j^K \mathcal{L}(f^*(\mathbf{x}), j)} = \frac{1}{K-1}$ , for all  $k \neq y$ . Also,

we have  $\mathcal{L}_{norm}(f_\eta^*(\mathbf{x}), k) = \frac{\mathcal{L}(f_\eta^*(\mathbf{x}), k)}{\sum_j^K \mathcal{L}(f_\eta^*(\mathbf{x}), j)} \leq \frac{1}{K-1}$ ,  $\forall k \neq y$ . Thus, for Eq. (8) to hold (e.g.  $\mathcal{L}_{norm}(f_\eta^*(\mathbf{x}), k) \geq \mathcal{L}_{norm}(f^*(\mathbf{x}), k)$ ), it must be the case that  $p_k = 0$ ,  $\forall k \neq y$ , that is,  $\mathcal{L}_{norm}(f_\eta^*(\mathbf{x}), k) = \mathcal{L}_{norm}(f^*(\mathbf{x}), k)$  for all  $k \in \{1, 2, \dots, K\}$ , thus  $f_\eta^* = f^*$  which completes the proof.  $\square$

**Lemma 3.**  $\forall \alpha, \forall \beta$ , if  $\mathcal{L}_{Active}$  and  $\mathcal{L}_{Passive}$  are noise tolerant, then  $\mathcal{L}_{APL} = \alpha \cdot \mathcal{L}_{Active} + \beta \cdot \mathcal{L}_{Passive}$  is noise tolerant.

*Proof.* Let  $\alpha, \beta \in \mathbb{R}$ , then  $\sum_j^K \mathcal{L}_{APL}(f(\mathbf{x}), j) = \alpha \cdot \sum_j^K \mathcal{L}_{Active}(f(\mathbf{x}), j) + \beta \cdot \sum_j^K \mathcal{L}_{Passive}(f(\mathbf{x}), j) = \alpha \cdot C_{Active} + \beta \cdot C_{Passive} = C$ . Following our proof for Lemma 1, for symmetric noise, we have,

$$R^\eta(f) = R(f) \left( 1 - \frac{\eta K}{K-1} \right) + \frac{(\alpha \cdot C_{Active} + \beta \cdot C_{Passive})\eta}{K-1}.$$

Thus,  $R^\eta(f^*) - R^\eta(f) = (1 - \frac{\eta K}{K-1})(R(f^*) - R(f)) \leq 0$ . Given  $\eta < \frac{K-1}{K}$  and  $f^*$  is a global minimizer of  $R(f)$ ,  $R(f^*) - R(f)$ , that is,  $f^*$  is also the global minimizer of risk  $R^\eta(f)$ . Thus,  $\mathcal{L}_{APL}$  is noise tolerant to symmetric label noise.

Following our proof for Lemma 2, for asymmetric noise, we have,

$$R^\eta(f) = (\alpha \cdot C_{Active} + \beta \cdot C_{Passive}) \mathbb{E}_{\mathbf{x}, y} (1 - \eta_y) - \mathbb{E}_{\mathbf{x}, y} \left[ \sum_{k \neq y} (1 - \eta_y - \eta_{yk}) \mathcal{L}_{norm}(f(\mathbf{x}), k) \right]. \quad (9)$$

As  $f_\eta^*$  is the minimizer of  $R^\eta(f)$ ,  $R^\eta(f_\eta^*) - R^\eta(f^*) \leq 0$ . So, from 9 above, we can derive the same equation as Eq. (8),

$$\mathbb{E}_{\mathbf{x}, y} \left[ \sum_{k \neq y} (1 - \eta_y - \eta_{yk}) \left( \underbrace{\mathcal{L}_{APL}(f^*(\mathbf{x}), k)}_{\mathcal{L}_{APL}^*} - \underbrace{\mathcal{L}_{APL}(f_\eta^*(\mathbf{x}), k)}_{\mathcal{L}_{APL}^{\eta^*}} \right) \right] \leq 0. \quad (10)$$

Thus, we can follow the same proof from Eq. (8), to  $f_\eta^* = f^*$ , that is,  $\mathcal{L}_{APL}$  is also noise tolerant to asymmetric noise.  $\square$
